# Supplementary material for: Independent Responses of Photosynthesis and Plant Morphology to Alterations of PIF Proteins and Light-Dependent MicroRNA Contents in Arabidopsis thaliana pif Mutants Grown under Lights of Different Spectral Compositions
Source: MDPI journal article supplement (doi:10.3390/cells11243981), 2022-12-09
Supplement: s1 [file s1]

Table S1. Primers for qRT-PCR analysis

|    | Gene Bank ID   | Gene description                                  | Gene          | Primer '5-3'             |                          |
|----|----------------|---------------------------------------------------|---------------|--------------------------|--------------------------|
|    |                |                                                   |               | forward                  | reverse                  |
| 2  | NM_001203404.1 | Squamosa promoter binding protein-like 7          | <i>SPL7</i>   | ACGTTTCGCTGTCTGTTTTC     | AGCTCTGTTGAACACAATCTCA   |
| 3  | O04379         | Argonaute 1                                       | <i>Ago1</i>   | TAGGGGCTGGAGGTCAAAGA     | CGGAATATACCTAGAGGTCGGC   |
| 4  | NM_119618.3    | cryptochrome-interacting basic-helix-loop-helix 1 | <i>CIB1</i>   | ATGCGACAAGATCACAGGCA     | TTGAGGCAACCTCTTTGGCA     |
| 5  | Q8GZM7         | Phytochrome interacting factor 1                  | <i>PIF1</i>   | GAATCCGGTTTAAACACGGCG    | ATCGACGTTTCGCTTCTCCG     |
| 6  | NM_001202630.2 | Phytochrome interacting factor 3                  | <i>PIF3</i>   | GCGCGTATAATCGGAAGGGA     | ATCGACGTTTCGCTTCTCCG     |
| 7  | NM_129862.3    | Phytochrome interacting factor 4                  | <i>PIF4</i>   | ATGGCGAGATGGACAAGTGG     | GTC GGGTTCGAATGGGTCTT    |
| 8  | NM_001335664.1 | Phytochrome interacting factor 5                  | <i>PIF5</i>   | CAGCTCGCTAGGTACATGGG     | GCC GGAGATCCAAATCCCAA    |
| 9  | NM_001037040.3 | Phytochrome interacting factor 7                  | <i>PIF7</i>   | GCGTCTTTTGAATCCGGTCG     | GACTCGTTGTGGAATCGCTGC    |
| 10 | F413V6         | Short hypocotyl in white light 1                  | <i>SHW1</i>   | AAGCATCGCGACGGATTTTG     | CACAGTTCCTCTAGATTGCATA   |
| 11 | P42774         | G-box-binding factor 1                            | <i>GBF1</i>   | TCCCATCCCCAGTTGGATCT     | GATGAGCATAGACTGCCCCC     |
| 12 | Q8S4Q6         | Far-red elongated hypocotyl 1                     | <i>FHY1</i>   | TGCCAATGTGCTTGTTTCAGA    | GTCTTCACCGCATGATCAG      |
| 13 | Q9LIE5         | Far-red elongated hypocotyl 3                     | <i>FHY3</i>   | AACGATTTGTGCGAACGAGC     | TGGTTGTCTCTCCACAGA       |
| 14 | Q9FE22         | Transcription factor HFR1                         | <i>HFR1</i>   | GATGCCATCGCCGCTAATTC     | ACCGTGAAGAGACTGAGGAGA    |
| 15 | NM_121888.3    | Squamosa promoter-binding-like protein 7          | <i>SPL7</i>   | GGATCGGGTTAGGAAGCGAG     | TCAAGCACACAACAAAGGTGGC   |
| 16 | NM_099986.4    | Endoribonuclease Dicer homolog 1                  | <i>DCL1</i>   | ATGCAGAGGTATTATCGATGTCT  | CAGGTAGGCCTTTGCAGGAT     |
| 17 | NM_001203853.2 | Small RNA 2'-O-methyltransferase                  | <i>HEN1</i>   | CACCCCAAGCTCTGATTGT      | CCGAGCTTTGATGCCCATTG     |
| 18 | NM_100842.4    | Double-stranded RNA-binding protein 1             | <i>HYL1</i>   | ACACAGGAGCTGCAACAAGA     | GCGGGATAGTGCCTGTATT      |
| 19 | NM_001036427.3 | Arabidopsis thaliana Actin 1                      | <i>Actin1</i> | TTAGCAACTGGGATGACATGGA   | CCTGAATGGCAACATACATAGCA  |
| 20 | MIMAT0000178   | ath-miR160a-5p                                    | MIR160        | TGCCTGGCTCCCTGTATGCA     | universal reverse primer |
| 21 | MIMAT0031879   | ath-miR165a-5p                                    | MIR165        | GGAATGTTGTCTGGATCGAGG    |                          |
| 22 | MIMAT0001016   | ath-miR319c                                       | MIR319        | TTGGACTGAAGGGAGCTCCTT    |                          |
| 23 | MIMAT0031908   | ath-miR396a-3p                                    | MIR396        | GTTCATAAAGCTGTGGGAAG     |                          |
| 24 | MIMAT0000184   | ath-miR163                                        | MIR163        | TTGAAGAGGACTTGGAACCTCGAT |                          |
| 25 | MIMAT0001003   | ath-miR402                                        | MIR402        | TTGAGGCCTATTAAACCTCTG    |                          |
| 26 | MIMAT0000198   | ath-miR168a-5p                                    | MIR168        | TCGCTTGGTGCAGGTCGGGAA    |                          |
| 27 | MIMAT0000203   | ath-miR172a                                       | MIR172        | AGAATCTTGATGATGCTGCAT    |                          |
| 28 | MIMAT0004252   | ath-miR833-5p                                     | MIR833        | TGTTTGTGTACTCGGTCTAGT    |                          |
| 29 | MIMAT0004243   | ath-miR827                                        | MIR827        | TTAGATGACCATCAACAAACT    |                          |
| 30 | MIMAT0031887   | ath-miR170-5p                                     | MIR170        | TATTGGCCTGGTTCACTCAGA    |                          |
| 31 | MIMAT0031888   | ath-miR171a-5p                                    | MIR171        | TATTGGCCTGGTTCACTCAGA    |                          |
| 32 | MIMAT0032014   | ath-miR472-5p                                     | MIR472        | ATGGTCGAAGTAGGCAAAATC    |                          |
| 33 | MIMAT0031880   | ath-miR166a-5p                                    | MIR166        | GGACTGTGTCTGGCTCGAGG     |                          |
| 34 | MIMAT0000196   | ath-miR167a-5p                                    | MIR167        | TGAAGCTGCCAGCATGATCTA    |                          |
| 35 | MIMAT0004302   | ath-miR858a                                       | MIR858        | TTTCGTTGTCTGTTTCGACCTT   |                          |
| 35 | MIMAT0031865   | ath-miR156a-5p                                    | MIR156        | TGACAGAAGAGAGTGAGCAC     |                          |
| 36 | MIMAT0031870   | ath-miR157a-5p                                    | MIR157        | TTGACAGAAGATAGAGAGCAC    |                          |
| 37 | MIMAT0000946   | ath-miR397a                                       | MIR397        | TCATTGAGTGACGCTTGATG     |                          |
| 38 | MIMAT0031912   | ath-miR398c-5p                                    | MIR398        | AGGGTTGATATGAGAACACAC    |                          |
| 39 | MIMAT0031915   | ath-miR408-5p                                     | MIR408        | ACAGGGAACAAGCAGAGCATG    |                          |
| 40 | NM_001344924.1 | U6 snRNA phosphodiesterase-like protein           | U6            | AGAGAGTTCACATAAGCTTAGGA  |                          |
